# Supplementary material
Source: PubMed Central journal article supplement (PMC4859590)
Supplement: JB.00927-15_zjb999094012so1.pdf [file JB.00927-15_zjb999094012so1.pdf]

## Supplementary Data

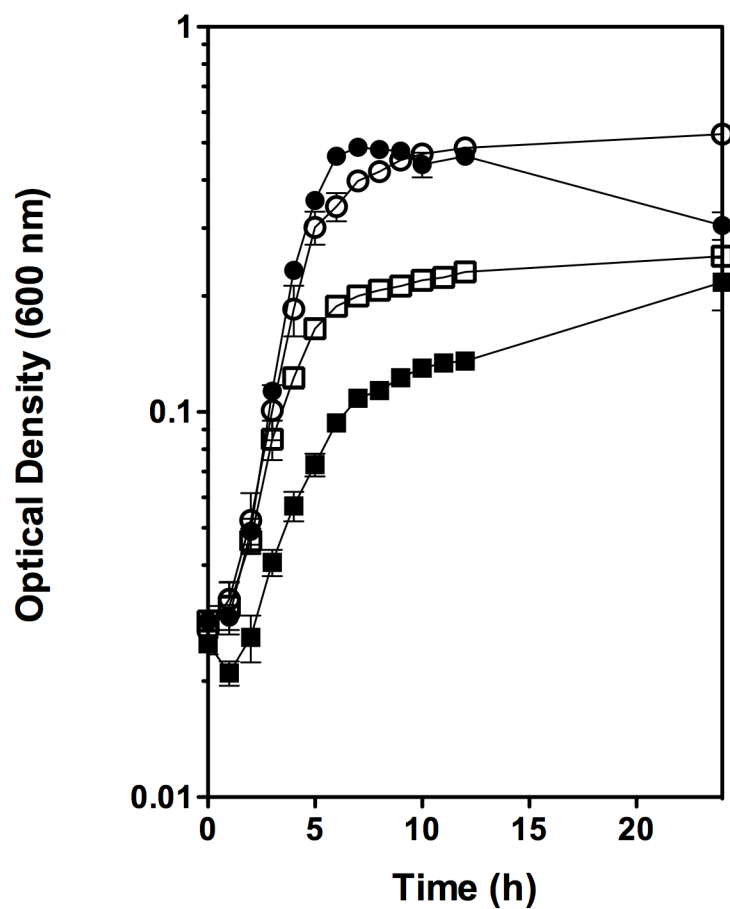

**Figure S1.** Growth of MR-1 and the  $\Delta fdh$  triple mutant with the addition of exogenous formate. MR-1 (circles) or the  $\Delta fdh$  triple mutant (squares) were grown in SBM with 20 mM lactate and 60 mM fumarate. Cultures were amended with 20 mM formate (closed symbols) or nothing (open symbols). Reported values are the average of at least three independent experiments and error bars represent standard error of the mean.

**Table S1: Bacterial strains used in this study**

| <b>Strain</b>                              | <b>Description</b>                                                                                                                                                                                                                    | <b>Reference</b> |
|--------------------------------------------|---------------------------------------------------------------------------------------------------------------------------------------------------------------------------------------------------------------------------------------|------------------|
| <i>E. coli</i> strain UQ950                | DH5 $\alpha$ host for cloning: F-( <i>argF-lac</i> )169 80 <i>dlacZ</i> 58(M15) <i>glnV</i> 44(AS) <i>rfbD</i> 1 <i>gyrA</i> 96(NalR) <i>recA</i> 1 <i>endA</i> 1 <i>spoT</i> 1 <i>thi</i> -1 <i>hsdR</i> 17 <i>deoR</i> <i>pir</i> + | (1)              |
| <i>E. coli</i> strain WM3064               | DAP auxotroph used for conjugation: <i>thrB</i> 1004 <i>pro</i> <i>thi</i> <i>rpsL</i> <i>hsdS</i> <i>lacZ</i> M15 RP4-1360 ( <i>araBAD</i> )567 <i>dapA</i> 1341::[ <i>erm</i> <i>pir</i> (wt)]                                      | (1)              |
| <i>S. oneidensis</i> strain MR-1           | Wild type                                                                                                                                                                                                                             | (2)              |
| $\Delta$ SO0101-0103                       | <i>S. oneidensis</i> with an in-frame deletion of <i>fdnGHI</i> (SO0101-0103)                                                                                                                                                         | This study       |
| $\Delta$ SO4509-4511                       | <i>S. oneidensis</i> with an in-frame deletion of <i>fdhABC</i> (SO4509-4511)                                                                                                                                                         | This study       |
| $\Delta$ SO4513-4515                       | <i>S. oneidensis</i> with an in-frame deletion of <i>fdhABC</i> (SO4511-4513)                                                                                                                                                         | This study       |
| $\Delta$ SO0101-0103/ $\Delta$ SO4509-4511 | <i>S. oneidensis</i> with an in-frame deletion of <i>fdnGHI</i> (SO0101-0103) and <i>fdhABC</i> (SO4509-4511)                                                                                                                         | This study       |
| $\Delta$ SO0101-0103/ $\Delta$ SO4513-4515 | <i>S. oneidensis</i> with an in-frame deletion of <i>fdnGHI</i> (SO0101-0103) and <i>fdhABC</i> (SO4513-4515)                                                                                                                         | This study       |
| $\Delta$ SO4509-4511/ $\Delta$ SO4513-4515 | <i>S. oneidensis</i> with an in-frame deletion of <i>fdhABC</i> (SO4509-4511) and <i>fdhABC</i> (SO4513-4515)                                                                                                                         | This study       |
| $\Delta$ <i>fdh</i>                        | <i>S. oneidensis</i> with an in-frame deletion of <i>fdnGHI</i> (SO0101-0103), <i>fdhABC</i> (SO4509-4511) and <i>fdhABC</i> (SO4513-4515)                                                                                            | This study       |
| $\Delta$ <i>fdh</i> $\Delta$ <i>pdh</i>    | <i>S. oneidensis</i> with an in-frame deletion of <i>fdnGHI</i> (SO0101-0103), <i>fdhABC</i> (SO4509-4511), <i>fdhABC</i> (SO4513-4515), and <i>aceE</i> (SO0424)                                                                     | This study       |
| $\Delta$ <i>atp</i>                        | <i>S. oneidensis</i> with an in-frame deletion of the ATP synthase operon (SO4746-4754)                                                                                                                                               | (3)              |
| $\Delta$ <i>fdh</i> $\Delta$ <i>atp</i>    | <i>S. oneidensis</i> with an in-frame deletion of <i>fdnGHI</i> (SO0101-0103), <i>fdhABC</i> (SO4509-4511), <i>fdhABC</i> (SO4513-4515), and the ATP synthase operon (SO4746-4754)                                                    | This study       |

**Table S2: Primers used in this study**

| Primer Name                                                                                    | Sequence (5' to 3') or Reference         |
|------------------------------------------------------------------------------------------------|------------------------------------------|
| Primers for $\Delta$ 0101-0103                                                                 |                                          |
| 0101_Up_F                                                                                      | CATGactagtAGCGTCGTATCGCGCTGCTC           |
| 0101_Up_R                                                                                      | CATGgaattcGTTTCATAGCGTTCTCTCACACTTTTG    |
| 0103_Dn_F                                                                                      | CATGgaattcCATTAATGAGTCATACAGCCGAGATAC    |
| 0103_Dn_R                                                                                      | CATGgagctcCGGCGAGCAGACTGTCCATC           |
| Primers for $\Delta$ 4509-4511                                                                 |                                          |
| 4509_Up_F                                                                                      | CATGactagtTTGCGTCGCCATCCTAGCCTTG         |
| 4509_Up_R                                                                                      | CATGgaattcCATCACACACACTCCTCTGGTTAG       |
| 4511_Dn_F                                                                                      | CATGgaattcGACTAACTAAAGCGATATGCTAAACCC    |
| 4511_Dn_R                                                                                      | CATGgagctcATGTTGAGCATTTGGTCGCCAC         |
| Primers for $\Delta$ 4513-4515                                                                 |                                          |
| 4513_Up_F                                                                                      | CATGactagtCGTGTCGTGGATTGTCTGCGTG         |
| 4513_Up_F2 (for deletion construct to delete S04513-4515 in the $\Delta$ 4509-4511 background) | CATGactagtAAAGGCAACTTGCGATGAG            |
| 4513_Up_R                                                                                      | CATGctcgagCATCGCTGACTTCTCCTAGATTAG       |
| 4515_Dn_F                                                                                      | CATGctcgagGAGTAACATACTCTGATAAAACAAAACCTC |
| 4515_Dn_R                                                                                      | CATGgagctcGTGATGATAGTACTAAGTCCGCCTC      |
| <i>aceE</i> (S00424)                                                                           | (4)                                      |
| ATP synthase operon (S04746-4754)                                                              | (3)                                      |

## References

1. **Saltikov, C, Newman, D.** 2003. Genetic identification of a respiratory arsenate reductase. Proc. Natl. Acad. Sci. U. S. A. **100**:10983-10988. doi: 10.1073/pnas.1834303100.
2. **Venkateswaran, K, Moser, D, Dollhopf, M, Lies, D, Saffarini, D, MacGregor, B, Ringelberg, D, White, D, Nishijima, M, Sano, H, Burghardt, J, Stackebrandt, E, Nealson, K.** 1999. Polyphasic taxonomy of the genus *Shewanella* and description of *Shewanella oneidensis* sp. nov. Int. J. Syst. Bacteriol. **49**:705-724.
3. **Hunt, KA, Flynn, JM, Naranjo, B, Shikhare, ID, Gralnick, JA.** 2010. Substrate-level phosphorylation is the primary source of energy conservation during anaerobic respiration of *Shewanella oneidensis* strain MR-1. J. Bacteriol. **192**:3345-3351. doi: 10.1128/JB.00090-10.
4. **Flynn, CM, Hunt, KA, Gralnick, JA, Srienc, F.** 2012. Construction and elementary mode analysis of a metabolic model for *Shewanella oneidensis* MR-1. BioSystems. **107**:120-128. doi: 10.1016/j.biosystems.2011.10.003.
